# Supplementary material for: The AMPK-related kinase NUAK2 suppresses glutathione peroxidase 4 expression and promotes ferroptotic cell death in breast cancer cells
Source: PubMed Central journal article supplement (PMC9076840; doi:10.1038/s41420-022-01044-y), 2022-05-06

**Supplementary Figure S1.** Relative viability of BT-549 cells 72 h after transfection with siRNA targeting *TEAD4* or non-targeting siRNA (control) followed by 48 hour treatment with the indicated dose of ML162 (n=3 independent experiments). Error bars show standard deviation centered on the mean, and p-values are from two-sided Student's t-tests.

# Supplementary Figure 1

**a** BT-549

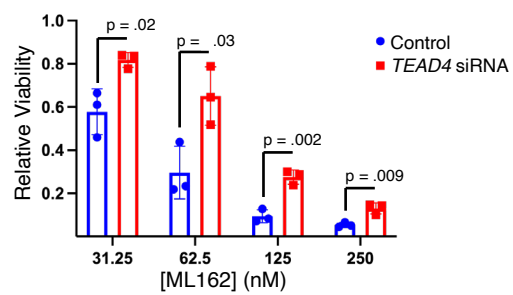

**Supplementary Figure S2.** (a) Western blot of the V5 epitope tag in BT-549 and (b) MDA-MB-231 cells stably over-expressing the V5-tagged-NUAK2 compared to a control line expressing eGFP ( $n = 1$  independent experiment for both cell lines). (c) Western blot of MDA-MB-231 cells transfected with cDNA encoding wild-type NUAK2 (representative of  $n = 3$  independent experiments). (d) Relative viability of these cells after 72 h incubation with the indicated dose of ML162 ( $n = 4$ ). Error bars denote standard deviation centered on the mean. p-values from Student's t-tests are shown.

## Supplementary Figure 2

**a** BT-549

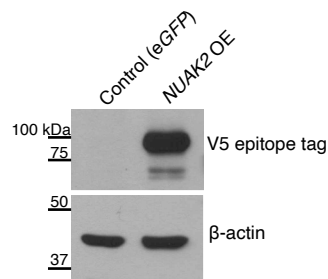

**b** MDA-MB-231

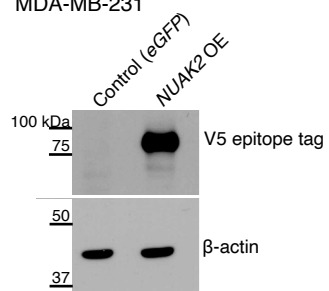

**c** MDA-MB-231

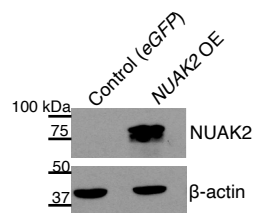

**d** MDA-MB-231

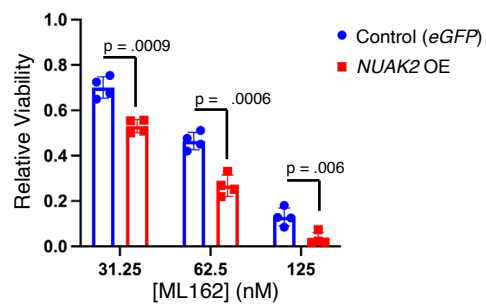

Supplement: 41420_2022_1044_MOESM1_ESM.pdf [file 41420_2022_1044_MOESM1_ESM.pdf]
