# Supplementary material for: The AMPK-related kinase NUAK2 suppresses glutathione peroxidase 4 expression and promotes ferroptotic cell death in breast cancer cells
Source: PubMed Central journal article supplement (PMC9076840; doi:10.1038/s41420-022-01044-y), 2022-05-06
Supplement: 41420_2022_1044_MOESM2_ESM.pdf [file 41420_2022_1044_MOESM2_ESM.pdf]

Fig 1a

Western blots

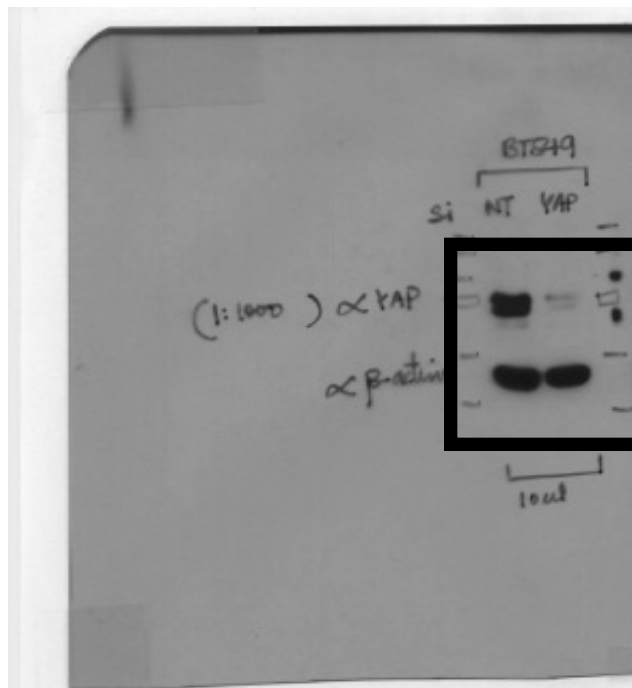

long exposure

anti-YAP1

anti-beta-actin

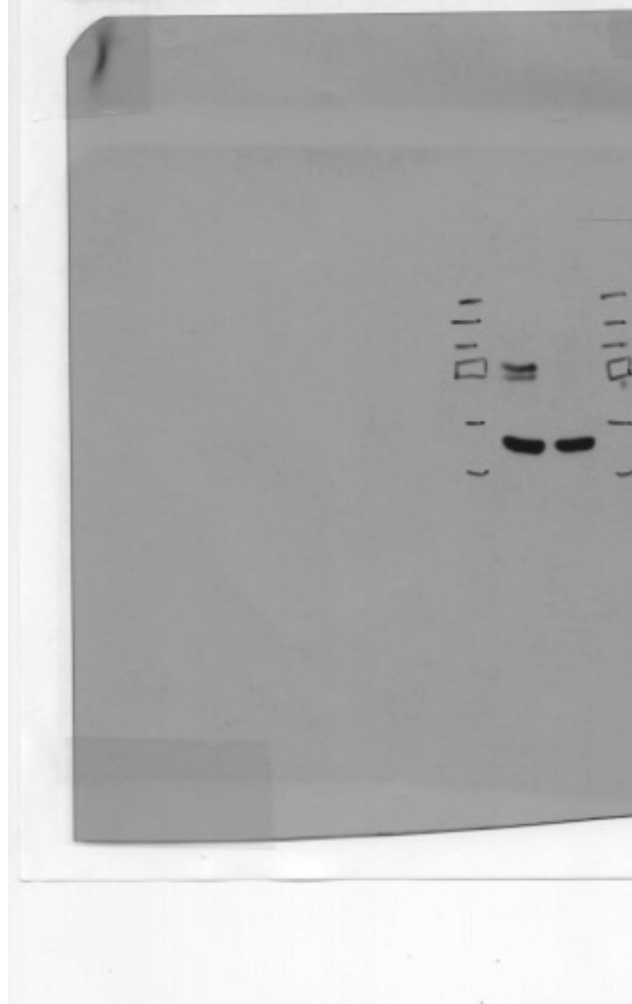

short exposure

anti-YAP1

anti-beta-actin

Fig 1d  
Western blots

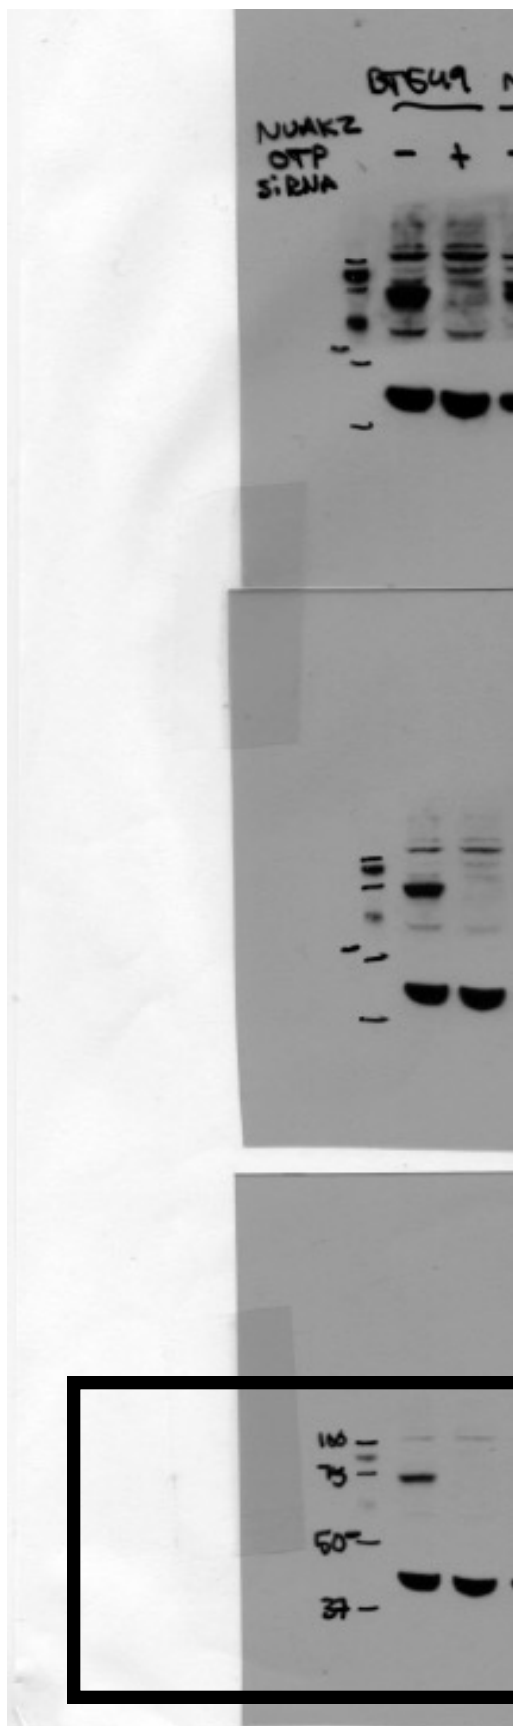

longest exposure

anti-NUAK2

anti-beta-actin

short exposure

anti-NUAK2

anti-beta-actin

shortest exposure  
used in the figure

anti-NUAK2

anti-beta-actin

Fig 1e

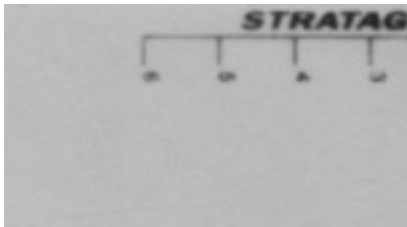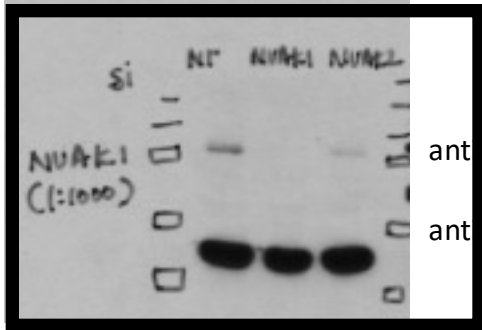

anti-NUAK1 used in the figure

anti-beta-actin

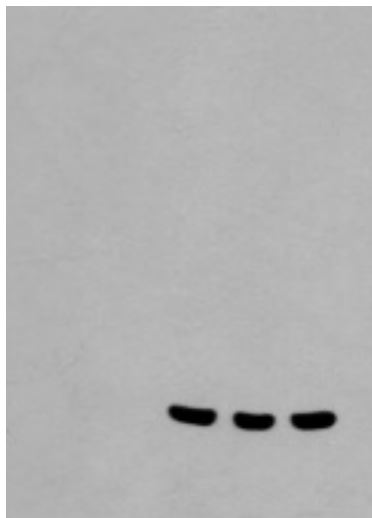

short exposure

anti-beta-actin

used in the figure

Fig 2a  
Western blots

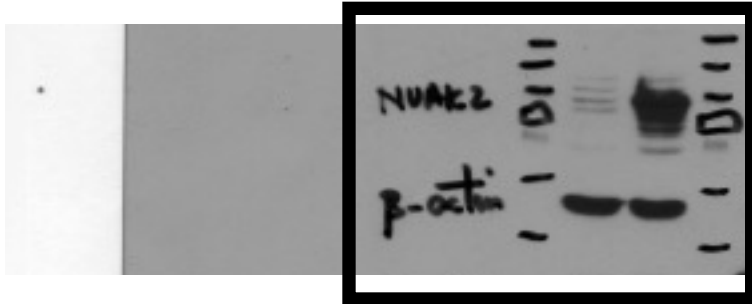

anti-NUAK2

anti-beta-actin

Western blots

Fig 4a

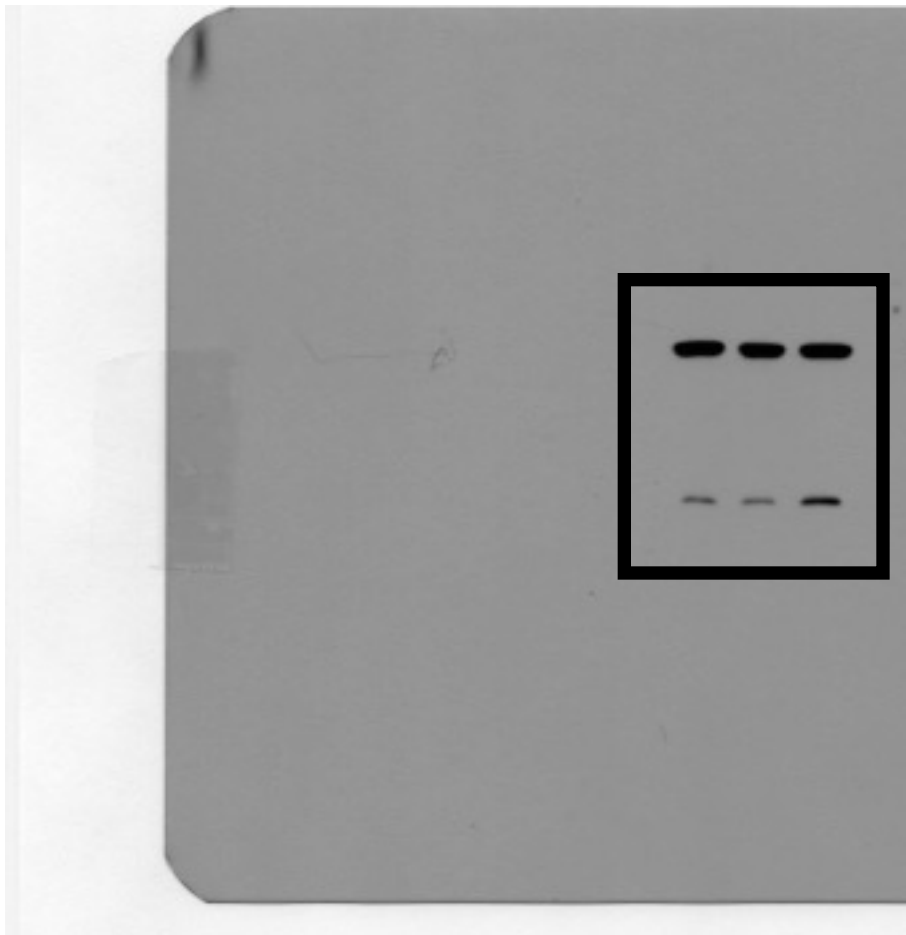

short exposure

anti-beta-actin

anti-GPX4

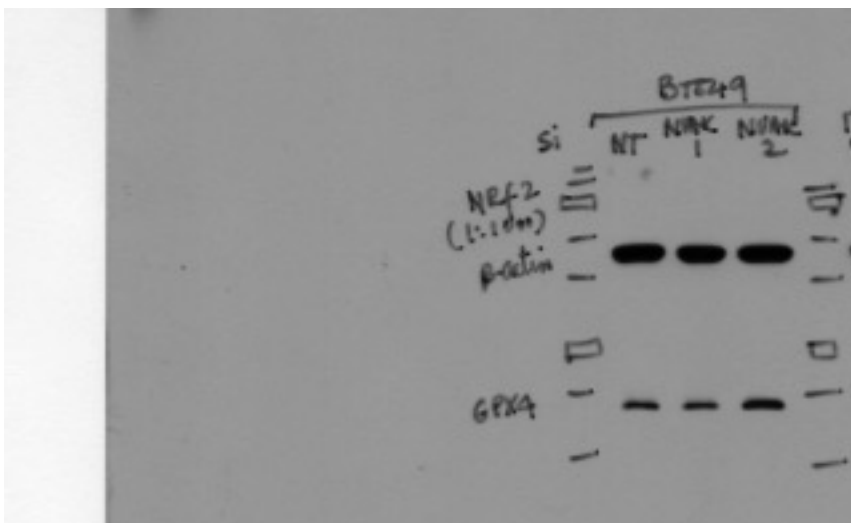

long exposure

anti-beta-actin

anti-GPX4

Western blots

Fig 4c

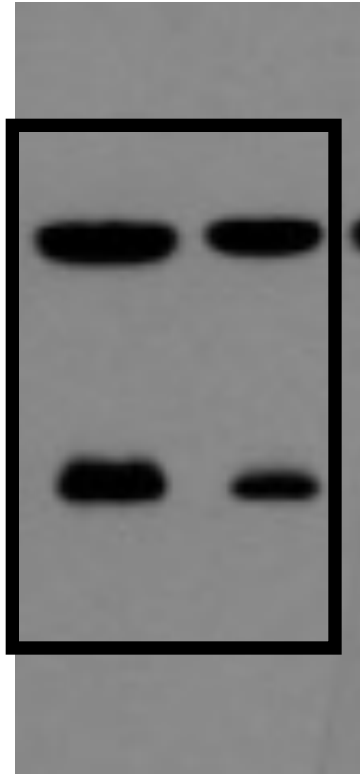

anti-beta-actin

anti-GPX4

Western blots

Fig 4d

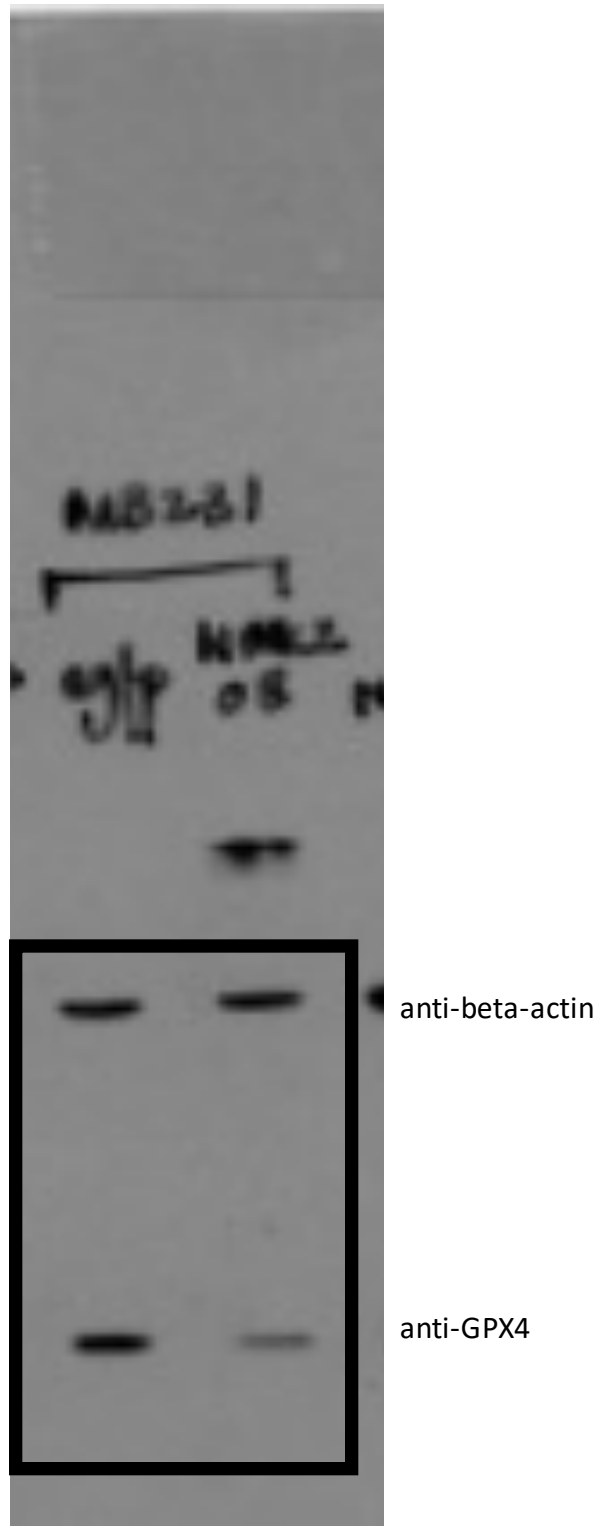

Western blots

Fig 5a

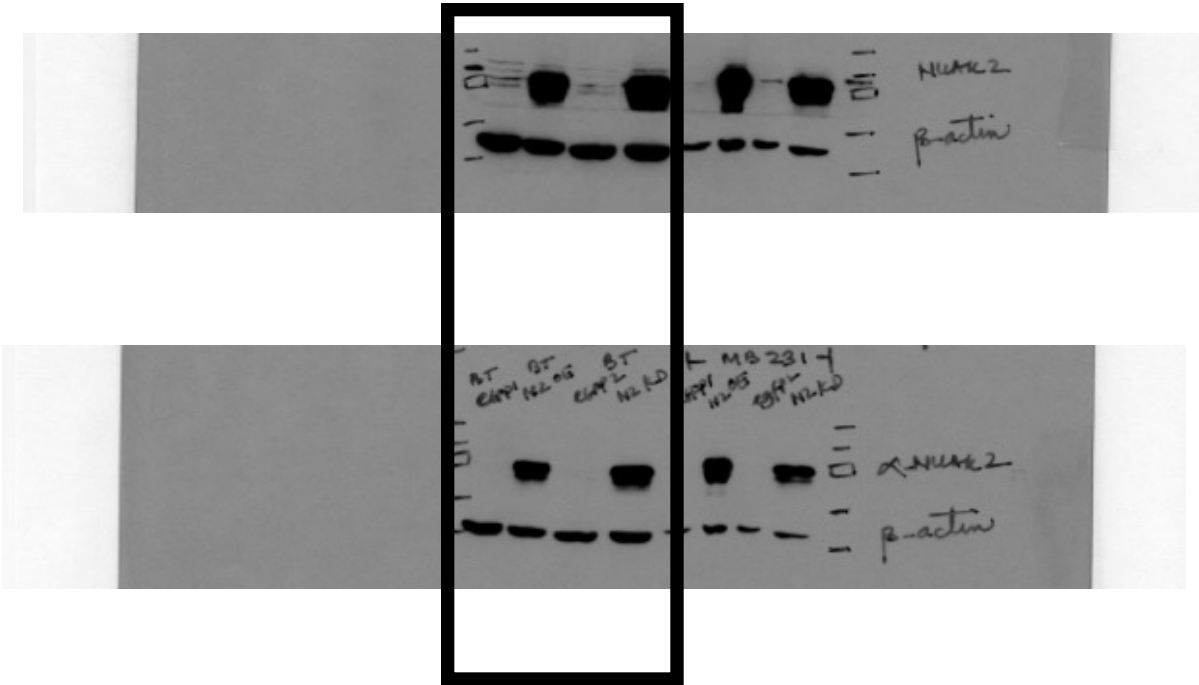



Western blots

Fig 6C

Short exposure

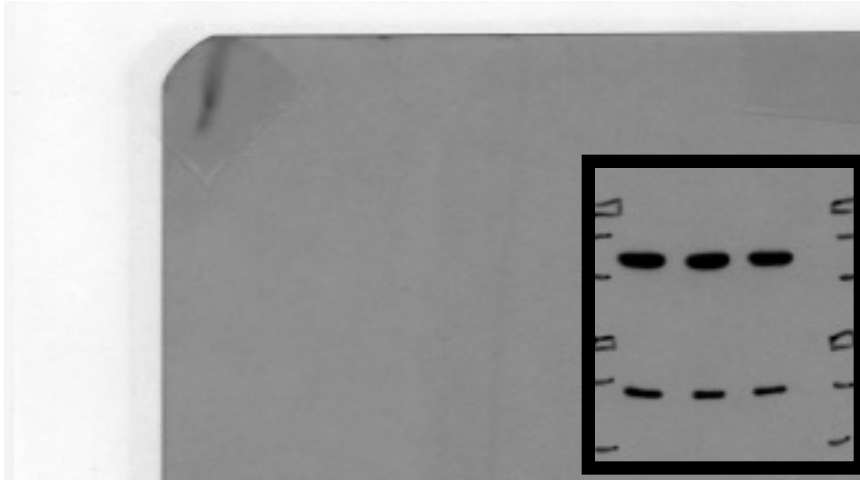

anti-beta-actin

anti-GPX4

Long exposure

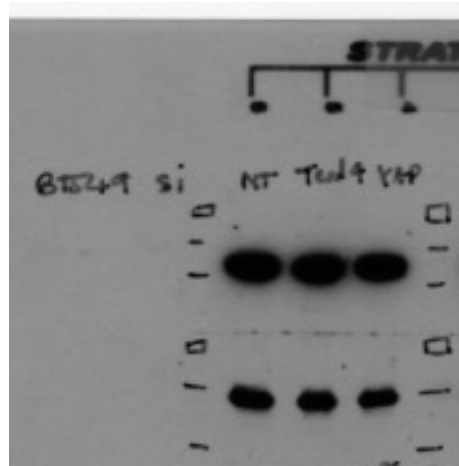

Western blots

Fig S2a

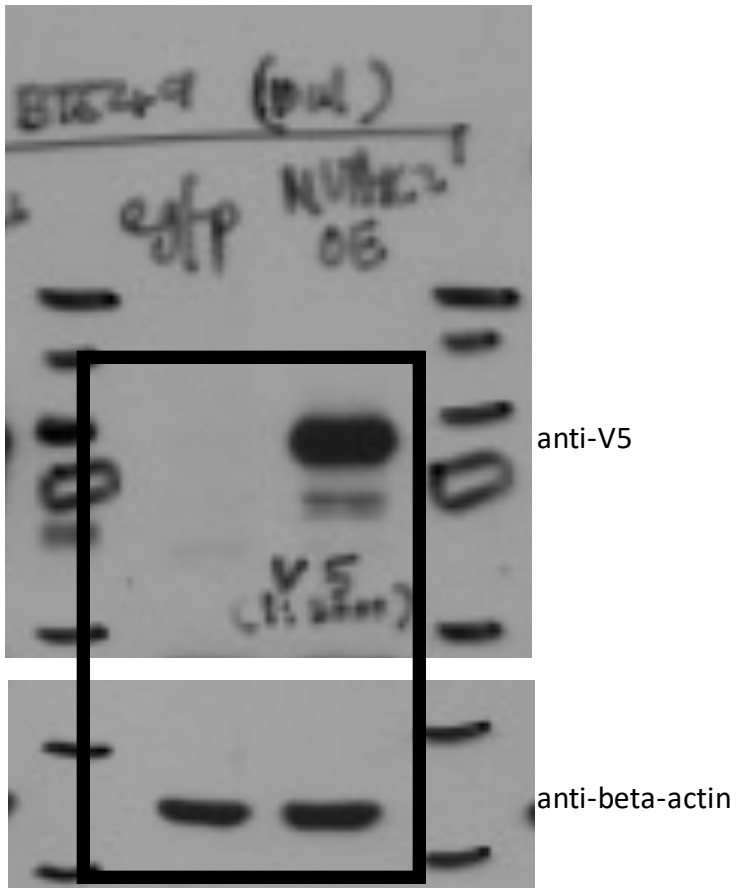

Western blots

Fig S2b

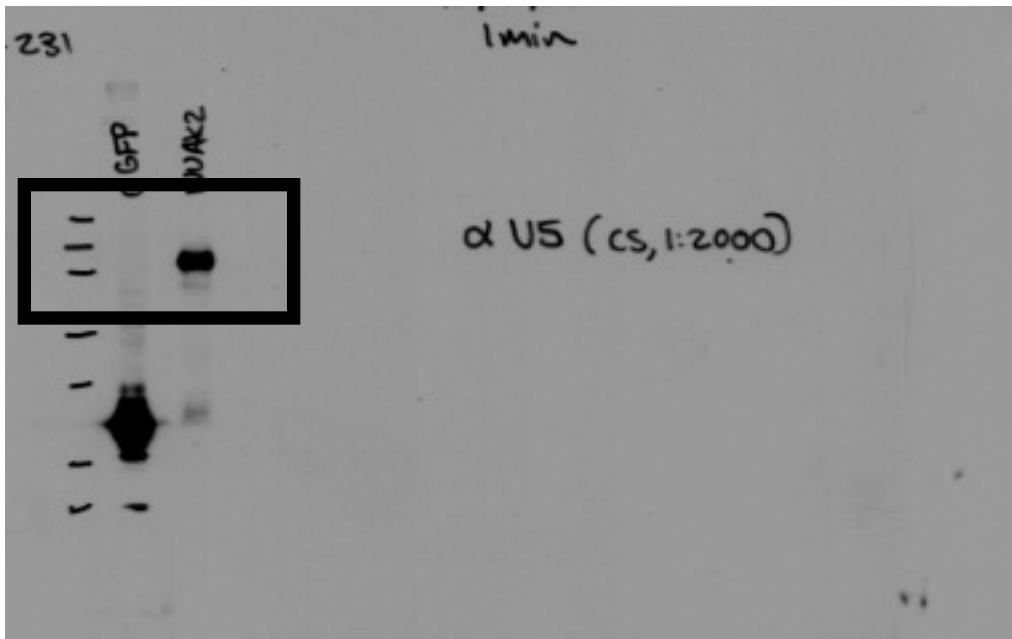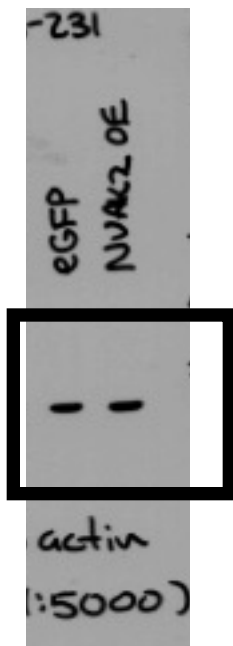

Western blots

Fig S2c

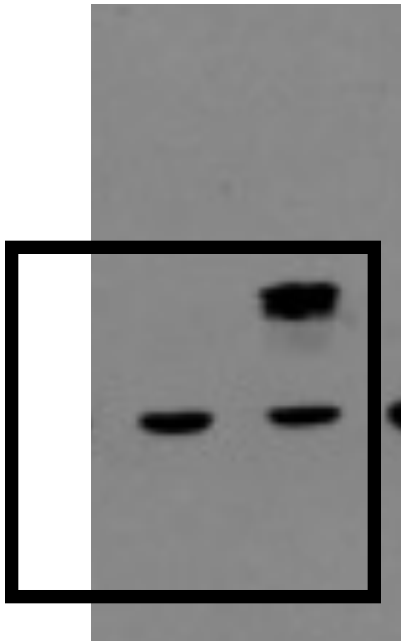

long exposure

anti-NUAK2

anti-beta-actin

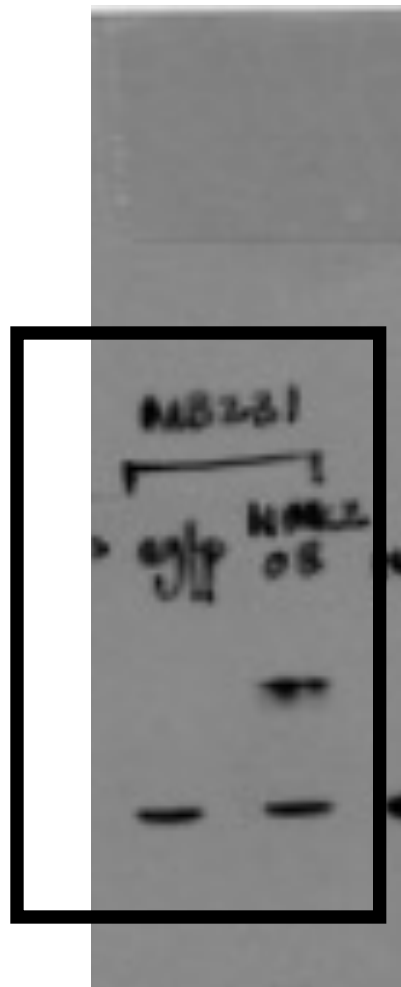

short exposure

anti-NUAK2

anti-beta-actin
